# Supplementary material
Source: PubMed Central journal article supplement (PMC4241451)
Supplement: mmc1.pdf [file mmc1.pdf]

# **Structural Insight into the Transmembrane Domain and the Juxtamembrane Region of the Erythropoietin Receptor in Micelles**

Qingxin Li,<sup>1</sup> Ying Lei Wong,<sup>2</sup> Qiwei Huang,<sup>2</sup> and CongBao Kang<sup>2,\*</sup>

<sup>1</sup>Institute of Chemical & Engineering Sciences and <sup>2</sup>Experimental Therapeutics Centre, Agency for Science, Technology and Research (A\*STAR), Singapore

Figure S1. Purification of the hEpoR from *E. coli*. This construct contained the TMD and JM region of the human EpoR. It was expressed and purified into 2 mM LMPC (A), 2 mM LMPG (B), 2 % bicelles (C) formed by DHPC and DMPC (q=0.33) and 15 mM DPC (D). Lane 1 is the molecular weight standard. Lane 2 is the cell lysate. Lane 3 is the supernatant of the cell lysate. Lane 4 is the pellet dissolved in the urea buffer. Lane 5 is the flow through fraction in the affinity purification. Lane 6 and 7 are the elution fractions from the Ni<sup>2+</sup>-NTA resin. E. Gel filtration analysis for the hEpoR. The hEpoR was purified in DPC micelles and followed by further purification using gel filtration chromatography. The fractions from the peak at retention volume of ~15 ml were combined and concentrated for NMR study. The gel filtration buffer contained 20 mM sodium phosphate, pH6.5, 15 mM DPC and 1 mM DTT.

Figure S2 H-D Exchange experiment of the hEpoR. The <sup>1</sup>H-<sup>15</sup>N-HSQC spectra of hEpoR in 5%, 10%, 30%, 50%, 70% and 90% D<sub>2</sub>O were collected at 313 K and processed.

Figure S3 Cross-linking study of the hEpoR (A) and mEpoR (B). Both hEpoR and hEpoR were prepared in DPC micelles and cross-linking was conducted. The samples were separated by SDS-PAGE and visualized by Commassie blue. “-” means no cross linker was added and “+” indicated that GA was added.

Figure S4 <sup>1</sup>H-<sup>15</sup>N HSQC spectra of hEpoR. A <sup>15</sup>N-labeled hEpoR was prepared in DPC micelles to obtain a sample contain 1 mM hEpoR and 50 mM DPC micelles. The HSQC spectrum of the sample (protein to DPC molar ratio was 1:50) was shown in red. DPC micelles stock (20% w/v) was added to the sample to change the molar ratio of protein to micelles to 1:200. The HSQC spectrum of the resulting sample was shown in black.

Figure S1

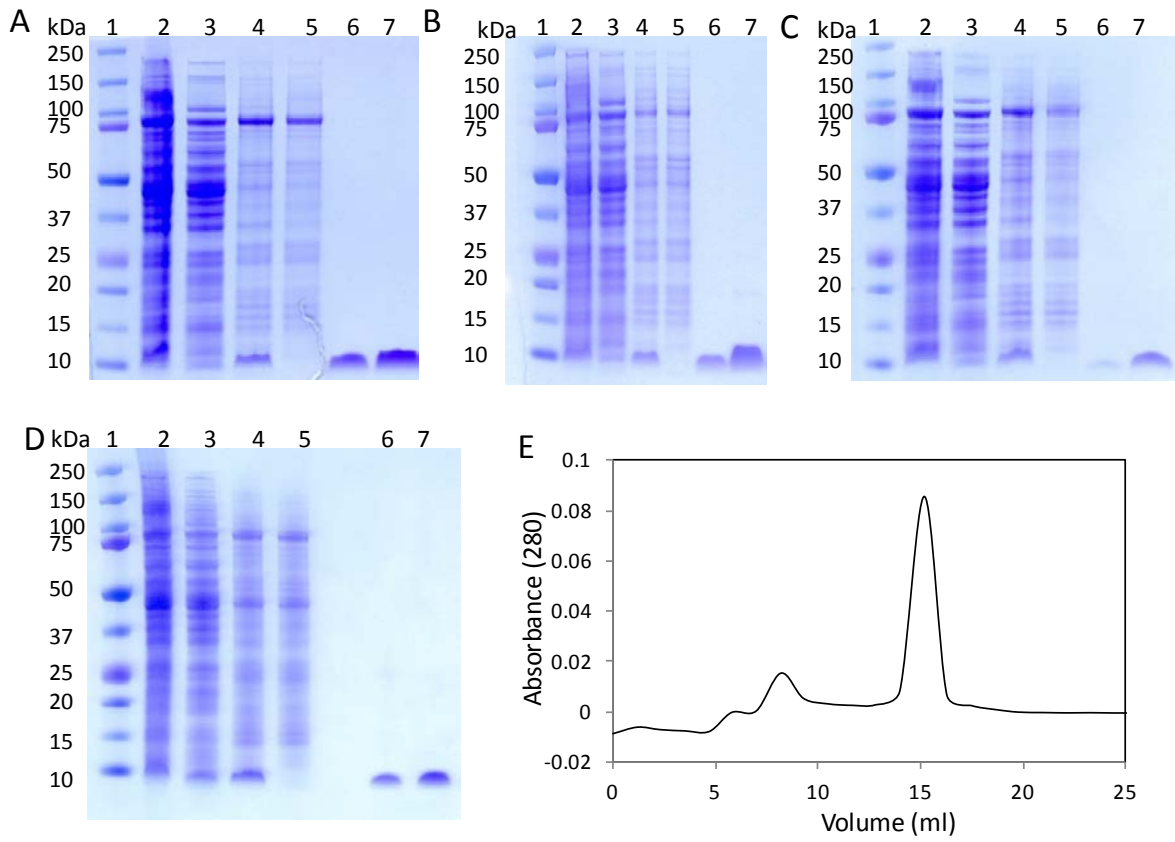

Figure S2

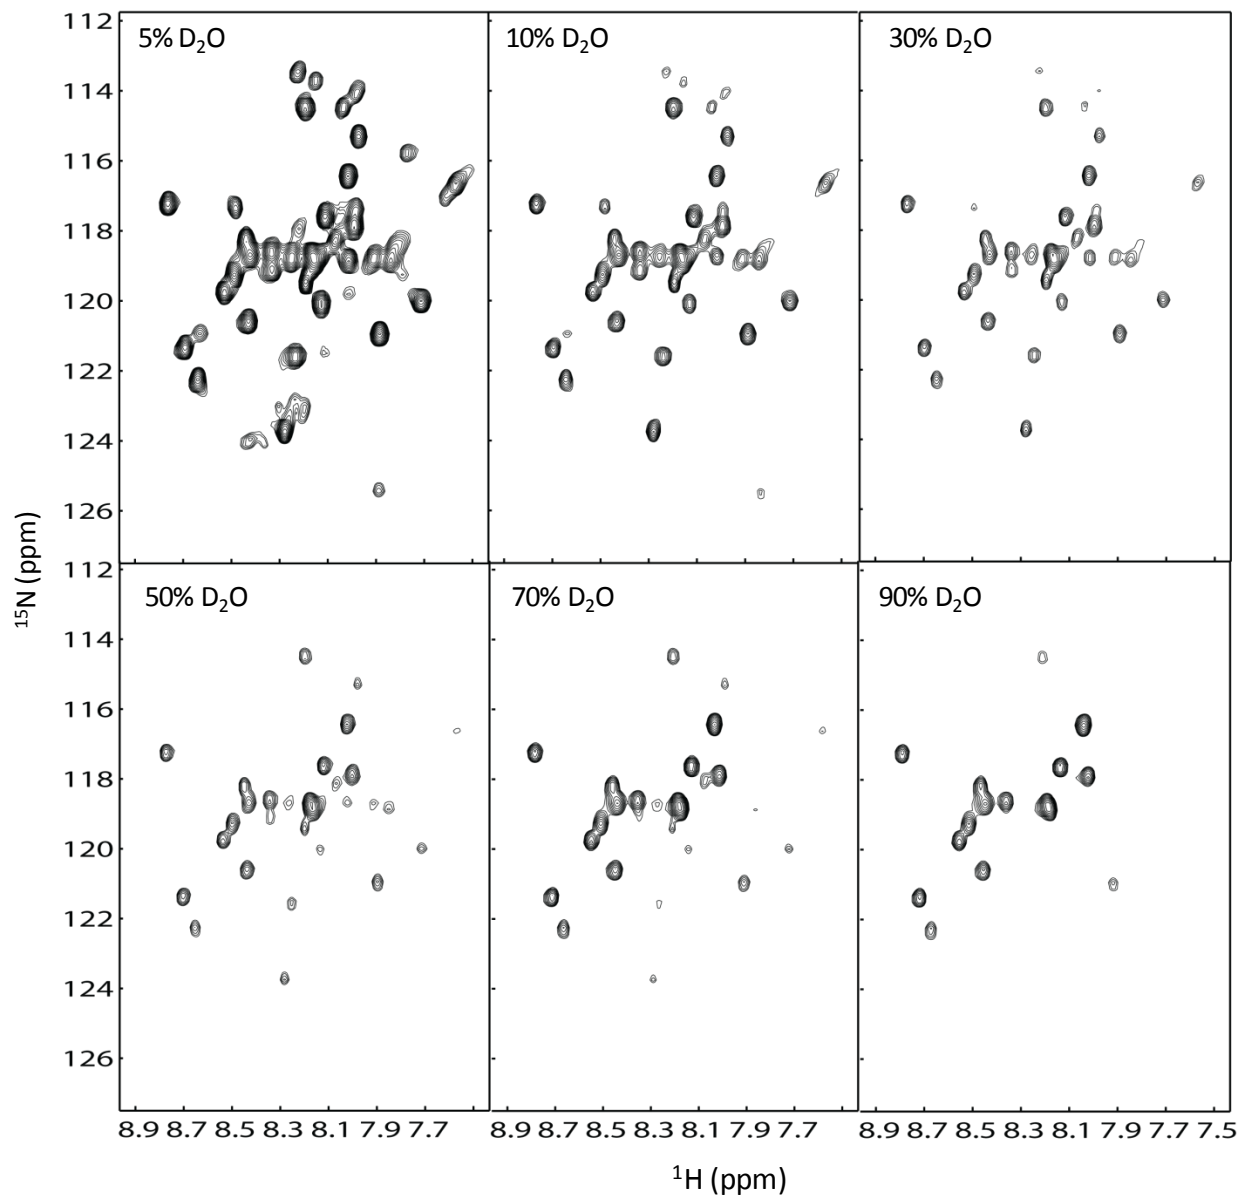

Figure S3

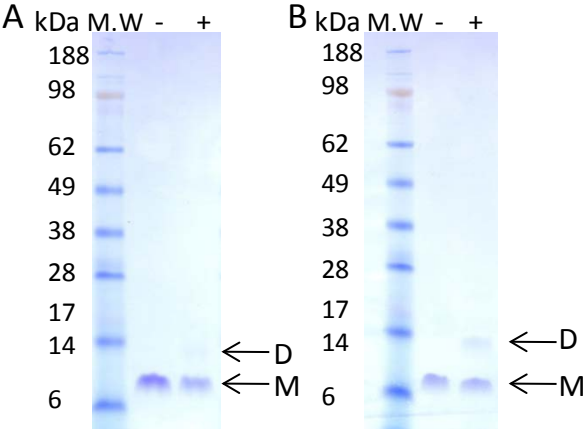

Figure S4

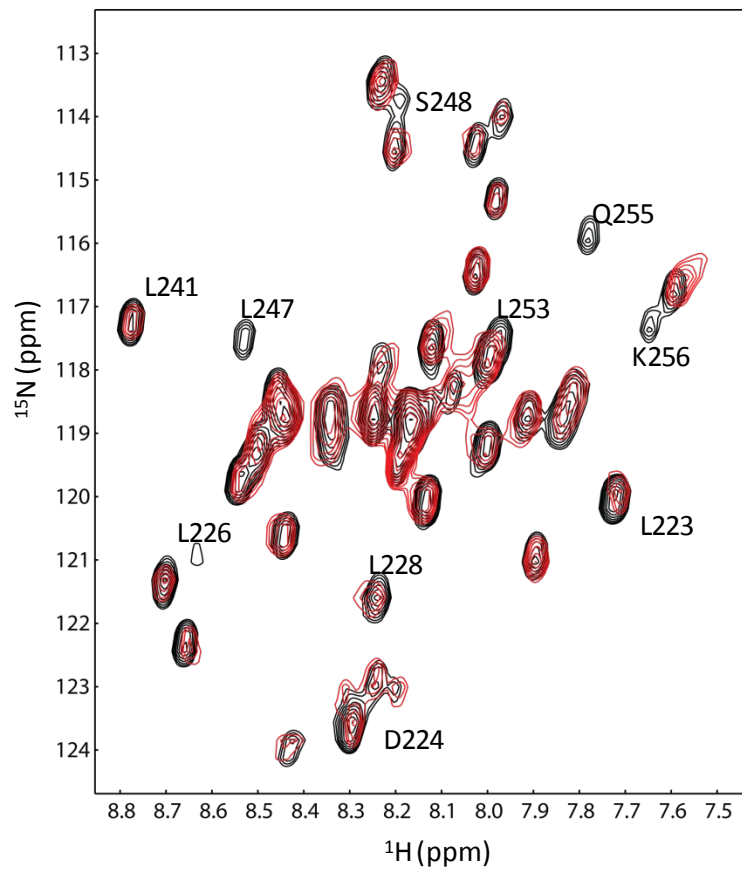

Supplementary Table 1 Assignment of the mEpoR in DPC micelles

| Res# | Residue | N    | HN     | CA    | CB    | C      |
|------|---------|------|--------|-------|-------|--------|
| 212  | SER     | 8.31 | 115.79 | 58.96 | 63.84 | 174.05 |
| 213  | GLU     | 8.25 | 121.82 | 55.13 | 29.38 | 174.78 |
| 214  | PRO     | ---  | ---    | 62.76 | 33.9  | 175.99 |
| 215  | ALA     | 8.58 | 126.16 | 53.84 | 19.18 | 178.41 |
| 216  | SER     | 8.05 | 113.84 | 59.34 | 63.82 | 175.3  |
| 217  | LEU     | 8.23 | 123.09 | 56.82 | 42.56 | 177.26 |
| 218  | LEU     | 7.8  | 116.64 | 55.84 | 42.4  | 177.03 |
| 219  | THR     | 7.82 | 110.68 | 62.07 | 69.75 | 174.81 |
| 220  | ALA     | 8.07 | 124.45 | 53.16 | 19.12 | 177.5  |
| 221  | SER     | 7.96 | 112.82 | 59.24 | 64.28 | 174.05 |
| 222  | ASP     | 8.2  | 120.4  | 54.52 | 41.09 | 175.64 |
| 223  | LEU     | 7.79 | 120.23 | 54.56 | 43.46 | 176.09 |
| 224  | ASP     | 8.28 | 123.27 | 53.38 | 42.93 | ---    |
| 225  | PRO     | ---  | ---    | ---   | ---   | ---    |
| 226  | LEU     | ---  | ---    | 58.38 | 41.14 | 178.25 |
| 227  | ILE     | 7.83 | 118.94 | 64.29 | 36.69 | 179.23 |
| 228  | LEU     | 8.26 | 121.99 | 58.89 | 41.85 | 177.73 |
| 229  | THR     | 7.97 | 115.31 | 68.38 | ---   | ---    |
| 230  | LEU     | 8.31 | 119.4  | 58.55 | 41.84 | 178.24 |
| 231  | SER     | 8.21 | 114.7  | 63.72 | 63    | 175.12 |
| 232  | LEU     | 7.94 | 121.09 | 58.11 | 41.75 | 178.51 |
| 233  | ILE     | 8.06 | 118.36 | 65.73 | 37.23 | 177.23 |
| 234  | LEU     | 8.27 | 119.24 | 58.48 | 41.73 | 179.94 |
| 235  | VAL     | 8.34 | 121.1  | 67.38 | 31.38 | 177.18 |
| 236  | LEU     | 8.36 | 120.01 | 58.78 | 41.81 | 178.7  |
| 237  | ILE     | 8.69 | 117.28 | 65.45 | 37.52 | 177.47 |
| 238  | SER     | 8.17 | 116.72 | 63.85 | 62.72 | 177.16 |
| 239  | LEU     | 8.46 | 124.3  | 58.28 | 41.85 | 178.05 |
| 240  | LEU     | 8.31 | 119.39 | 58.5  | 41.75 | 178.57 |
| 241  | LEU     | 8.59 | 117.06 | 58.34 | 41.71 | 178.33 |
| 242  | THR     | 7.88 | 116.13 | 68.55 | 67.72 | 176.26 |
| 243  | VAL     | 8.26 | 120.38 | 67.6  | 31.38 | 177.5  |
| 244  | LEU     | 8.33 | 118.53 | 58.42 | 41.78 | 179.31 |
| 245  | ALA     | 8.59 | 122.08 | 55.57 | 18.47 | 179.79 |
| 246  | LEU     | 8.38 | 118.27 | 58.08 | 42.31 | 178.88 |
| 247  | LEU     | 8.43 | 117.22 | 57.51 | 42.14 | 179.36 |
| 248  | SER     | 8.11 | 113.55 | 61.13 | 63.81 | 175.32 |

|     |     |      |        |       |       |        |
|-----|-----|------|--------|-------|-------|--------|
| 249 | HIS | 7.97 | 119.17 | 57.06 | 30.42 | ---    |
| 250 | ARG | 7.79 | 120    | 58.82 | 29.82 | ---    |
| 251 | ARG | ---  | ---    | 58.86 | 29.79 | 178.05 |
| 252 | THR | 7.83 | 114.29 | 64.98 | 68.87 | 176.28 |
| 253 | LEU | 7.94 | 120.68 | 57.55 | 42.2  | 178.25 |
| 254 | GLN | 8.47 | 118.11 | 59.47 | 28.74 | 177.25 |
| 255 | GLN | 7.76 | 116.06 | 57.43 | 28.75 | 176.58 |
| 256 | LYS | 7.62 | 116.8  | 57.01 | 32.82 | 176.67 |
| 257 | ILE | 7.58 | 116.59 | 62.62 | 38.67 | 174.71 |
| 258 | TRP | 7.93 | 118.82 | 55.66 | 28.78 | 173.58 |
